# Supplementary material for: Ultrahigh Pressure Processing Produces Alterations in the Metabolite Profiles of Panax ginseng
Source: PubMed Central journal article supplement (PMC6273588; doi:10.3390/molecules21060816), 2016-06-22
Supplement: molecules-21-00816-s001.pdf [file molecules-21-00816-s001.pdf]

# Supplementary Materials: Ultrahigh Pressure Processing Induces Alterations in the Metabolite Profiles of *Panax ginseng*

Mee Youn Lee, Digar Singh, Sung Han Kim, Sang Jun Lee and Choong Hwan Lee

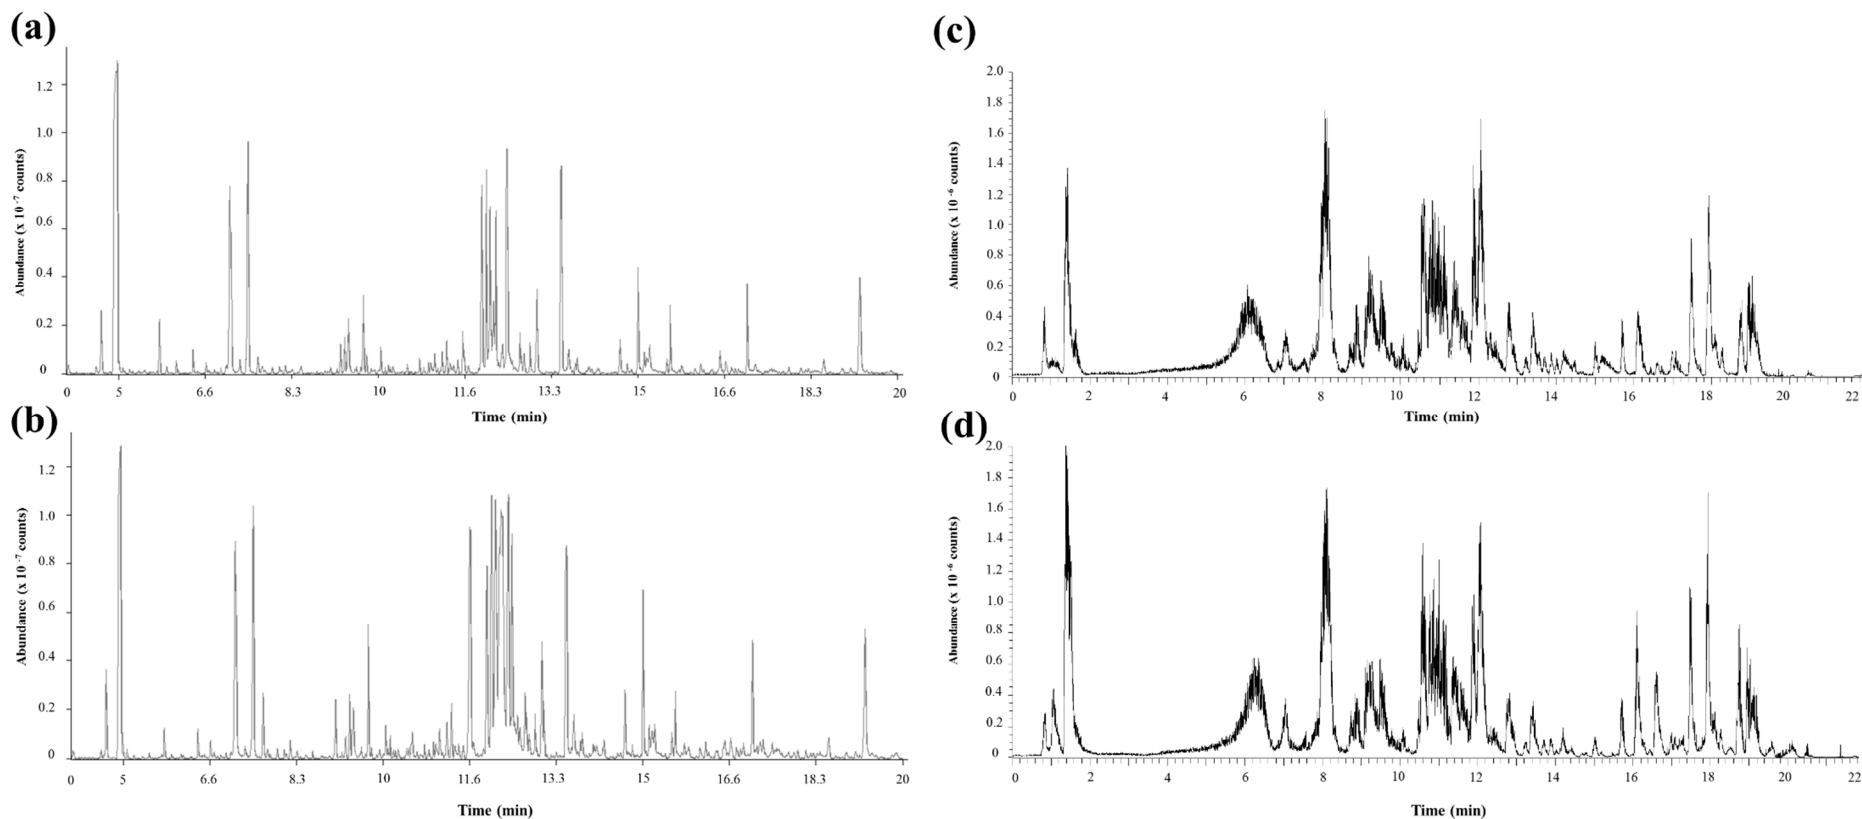

**Figure S1.** Chromatogram of the non-treated ginseng berry (GB) (a,c) and the UHP-treated ginseng berry (UGB) (b,d) extract analyzed with GC-TOF-MS (a,b) and UHPLC-LTQ-MS/MS in positive mode (c,d).

**Table S1.** The average relative levels of the significantly discriminant metabolites in GB and UGB extracts indicated in the respective steps of the metabolic pathway shown in Figure 4.

| Compound Name                | Average of Peak Area <sup>a</sup> |   |         |           |   |         |
|------------------------------|-----------------------------------|---|---------|-----------|---|---------|
|                              | GB                                |   |         | UGB       |   |         |
| Primary Metabolites          |                                   |   |         |           |   |         |
| Amino Acids                  |                                   |   |         |           |   |         |
| Serine                       | 8252                              | ± | 1542    | 24,504    | ± | 1502    |
| Threonine                    | 2460                              | ± | 316     | 6288      | ± | 482     |
| Aspartic acid                | 147,876                           | ± | 25,276  | 256,899   | ± | 4995    |
| GABA                         | 58,386                            | ± | 3424    | 43,316    | ± | 612     |
| Hydroxyglutaric acid         | 21,783                            | ± | 847     | 9051      | ± | 140     |
| Glutamic acid                | 18,332                            | ± | 2996    | 81,938    | ± | 1661    |
| Asparagine                   | 8529                              | ± | 3120    | 33,419    | ± | 1477    |
| Tryptophan                   | 54,087                            | ± | 20,594  | 192,891   | ± | 9137    |
| Organic acids                |                                   |   |         |           |   |         |
| Lactic acid                  | 352,677                           | ± | 6851    | 338,098   | ± | 7584    |
| Malic acid                   | 4691                              | ± | 757     | 57265     | ± | 1102    |
| Benzoic acid                 | 5227                              | ± | 310     | 6318      | ± | 197     |
| Shikimic acid                | 3911                              | ± | 281     | 4308      | ± | 93      |
| Citric acid                  | 35,249                            | ± | 1258    | 614,765   | ± | 12,055  |
| Gluconic acid                | 92                                | ± | 42      | 431       | ± | 12      |
| Sugars and Sugar Derivatives |                                   |   |         |           |   |         |
| Glyceric acid                | 9823                              | ± | 9261    | 53,848    | ± | 7488    |
| <i>meso</i> -Erythritol      | 78,280                            | ± | 3644    | 52,156    | ± | 904     |
| Ribitol                      | 2378                              | ± | 168     | 1287      | ± | 674     |
| Glactose                     | 204,056                           | ± | 3946    | 236,850   | ± | 3790    |
| Glucose                      | 31,282                            | ± | 1911    | 500,324   | ± | 9188    |
| <i>myo</i> -Inositol         | 150,474                           | ± | 4444    | 136,641   | ± | 3691    |
| Turanose                     | 32,177                            | ± | 8572    | 17,253    | ± | 1971    |
| Ethylmalonic acid            | 2499                              | ± | 187     | 2837      | ± | 286     |
| Fatty Acids                  |                                   |   |         |           |   |         |
| Linoleic acid                | 975                               | ± | 62      | 840       | ± | 35      |
| Stearic acid                 | 2693                              | ± | 69      | 3085      | ± | 94      |
| Secondary Metabolites        |                                   |   |         |           |   |         |
| Notoginsenoside R1           | 3,041,114                         | ± | 78,123  | 4,038,299 | ± | 152,690 |
| Ginsenoside-Re               | 2,519,807                         | ± | 107,869 | 3,726,045 | ± | 175,049 |
| Ma-Ginsenoside Re            | 4911398                           | ± | 241,612 | 6,497,414 | ± | 300,877 |
| Ginsenoside-Rb1              | 1048915                           | ± | 46,579  | 1,471,512 | ± | 66,716  |
| Notoginsenoside R2           | 6906175                           | ± | 333,683 | 8,793,301 | ± | 409,718 |
| Ginsenoside-Rd               | 278,342                           | ± | 22,995  | 366,493   | ± | 37,867  |
| Ma-Ginsenoside Rd            | 988233                            | ± | 94,161  | 1,308,145 | ± | 65,951  |
| Notoginsenoside Rt1          | 6138233                           | ± | 351,518 | 6,964,508 | ± | 252,809 |
| Ma-Notoginsenoside Rt1       | 345,271                           | ± | 23,170  | 384,138   | ± | 26,874  |
| Ginsenoside-Rg3              | 950,600                           | ± | 54,404  | 1,133,790 | ± | 45,576  |

<sup>a</sup> Data are presented as mean ± SD.
